# Supplementary material
Source: PubMed Central journal article supplement (PMC7769591)
Supplement: NIHMS1598989-supplement-Supplemental_Figures.pdf [file NIHMS1598989-supplement-Supplemental_Figures.pdf]

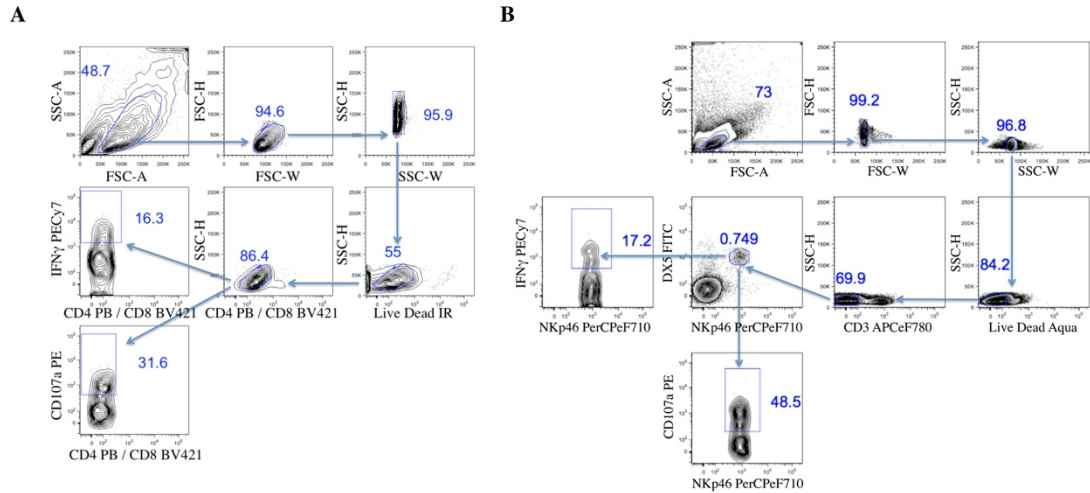

**Supplemental Figure 1.** Gating strategy for LAKs and Poly I:C-stimulated NK cells. (A) LAKs were gated by FSC/SSC, followed by singlet selection (FSC-W/FSC-H and SSC-W/SSC-H), exclusion of dead cells, and exclusion of CD4<sup>+</sup> and CD8<sup>+</sup> T cells. (B) Splenocytes from Poly I:C-treated mice were gated by FSC/SSC, followed by singlet selection (FSC-W/FSC-H and SSC-W/SSC-H), exclusion of dead cells, and exclusion of CD3<sup>+</sup> T cells, and gating on NK cells (DX5<sup>+</sup>/NKp46<sup>+</sup>).

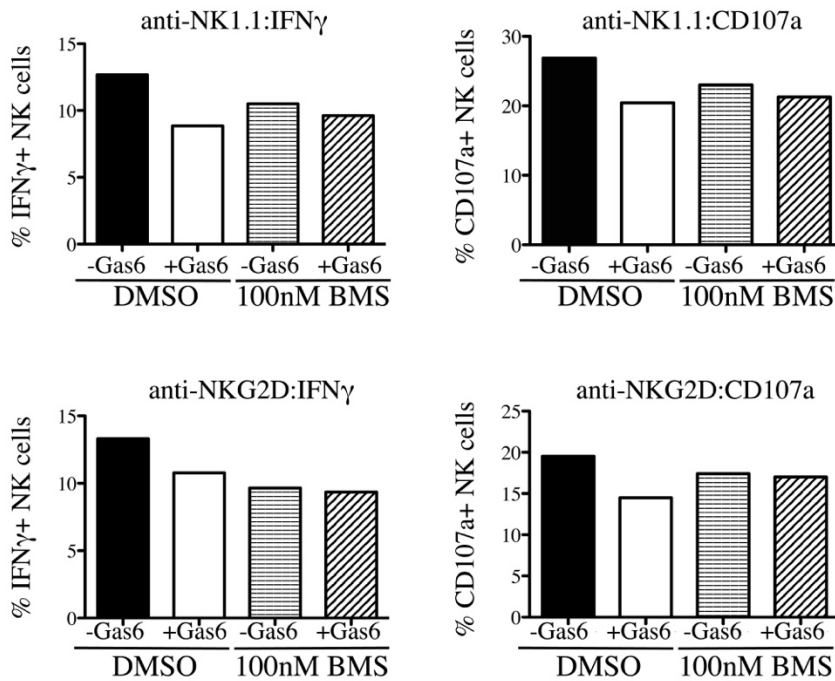

**Supplemental Figure 2.** LAKs were treated with media (0.05% DMSO) or BMS 777607 (100 nM) for 2 hours in IL-2/serum-free conditions, followed by treatment with or without Gas6 for another 2 hours prior to stimulation with anti-NK1.1 or NKG2D for 5 hours. Cells were stained for IFN $\gamma$  and CD107a expression and analyzed by flow cytometry. The %IFN $\gamma$ + and CD107a+ cells of all NK cells are depicted for all conditions. 1 representative experiment of 4 independent experiments is shown.

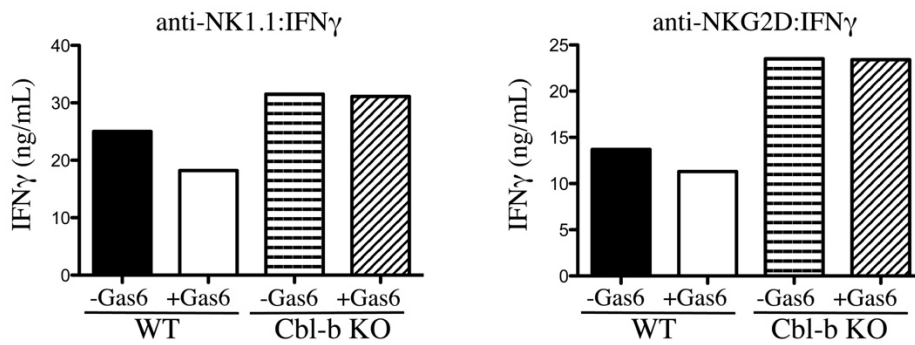

**Supplemental Figure 3.** WT and Cbl-b KO LAKs were serum/IL-2-starved for 2 hours, followed by Gas6 treatment for 2 hours, and stimulated with anti-NK1.1 or anti-NKG2D antibodies for 24 hours. IFN $\gamma$  content in the supernatants was measured by ELISA. 1 representative of 3 independent experiments is shown.
